# Supplementary material for: Galantamine plasma concentration and cognitive response in Alzheimer’s disease
Source: PeerJ. 2019 May 2;7:e6887. doi: 10.7717/peerj.6887 (PMC6500725; doi:10.7717/peerj.6887)
Supplement: Dataset S1 — Raw data that the patients were willing to share publicly. [file peerj-07-6887-s001.xls]

## Sheet: Sheet2
	no.		sex	Conc. (ng/mL)		APOE
		edu			I/D form		CDRM-1	CDRO-1	CDRJ-1	CDRC-1	CDRH-1	CDRP-1	CDR-1	MMSE-1	CASI-1	LTM-1	STM-1	ATT-1	Conce-1	Orient-1	Draw-1	Abst-1	Fluen-1	LAN-1	CDRM-2	CDRO-2	CDRJ-2	CDRC-2	CDRH-2	CDRP-2	CDR-2	MMSE-2	CASI-2	LTM-2	STM-2	ATT-2	Conce-2	Orient-2	Draw-2	Abst-2	Fluen-2	LAN-2
1	Y8	2	F	63.5	II	E3/E4	0.5	0.5	0	0	0	0	0.5	16	63	8	2.3	6	8	11	9	7	4	7.5	1	0.5	0	0	0	0	0.5	21	72	10	4.8	6	10	13	10	8	3	7.5
2	Y10	9	M	184.2	DD	E3/E4	1	0.5	1	0.5	1	1	1	23	83	10	7.8	6	8	17	10	9	6	9.4	0.5	0	0.5	0	0	0	0.5	22	87	10	7	5	12	18	10	10	7	8.4
3	Y19	0	F	ND	ID	E3/E4	1	1	1	1	1	1	1	15	55	9	1	7	7	10	3	6	5	7	2	1	2	1	2	1	1	10	36	10	0	5	0	7	0	6	4	4
4	Y33	0	F	ND	II	E3/E3	2	1	1	1	1	1	1	4	31	7	0.5	1	0	8	4	5	1	4.7	2	2	2	1	1	1	1	2	9	1	0	1	0	2	1	0	0	3.4
5	Y56	6	F	ND	ID	E3/E3	2	2	2	1	2	1	2	6	34	6	0	4	3	2	10	4	2	3	2	2	2	1	2	1	2	8	37	3	0	6	5	1	10	6	3	3
6	Y59	6	M	94	ID	E3/E3	1	0.5	1	1	1	0	1	24	83	10	8.3	6	8	18	10	8	6	9	1	0	1	0.5	0.5	0	0.5	26	85	10	8.9	8	6	18	8	11	5	10
7	Y75	0	F	ND	II	E3/E3	0.5	0.5	0.5	0.5	0.5	0	0.5	21	78	10	6.3	7	8	15	9	8	6	8.5	0.5	0.5	0.5	0.5	0.5	0	0.5	20	76	10	7.4	6	7	13	8	9	7	8.5
8	Y77	6	F	16.2	II	E3/E3	0.5	0	0	0	0	0	0	19	69	10	7.8	5	5	16	8	7	4	6	1	1	0.5	0.5	0.5	1	0.5	21	72	10	8.2	5	6	13	8	9	6	6.5
9	Y172	6	F	86.4669	ID	E3/E3	2	2	2	2	2	2	2	4	11	4	0	1	0	1	0	1	0	3.7	2	1	1	1	1	1	1	13	32	4	0.5	4	0	7	4	4	2	6
10	Y122	12	M	55.1564	II	E3/E3	1	0	0	0	0	0	0.5	26	87	10	5	7	10	18	10	9	8	10	1	1	1	1	0.5	0	1	19	75	10	5.9	6	8	9	10	10	7	8.7
11	Y184	12	F	106.612	ID	E3/E3	0.5	0.5	0.5	0.5	0.5	1	0.5	24	89	10	7.8	8	8	16	9	10	3	9.5	1	0	1	1	0.5	1	1	25	85	10	9.3	7	8	18	9	9	7	8
12	Y138	6	M	131.6	DD	E3/E3	2	2	2	2	2	2	2	12	43	8	0.6	3	0	10	9	6	3	3.5	2	1	2	1	2	2	2	16	51	7	0	4	0	17	10	5	2	5.7
13	Y196	6	M	67.5372	II	E3/E3	2	2	1	1	1	0	1	6	31	9	0	2	2	2	0	3	5	7.5	2	2	1	1	1	0	1	5	22	8	0	1	2	1	4	1	0	5
14	Y195	12	M	49.196			0.5	0.5	0.5	0.5	0.5	0.5	0.5	24	81	10	6.3	7	8	18	10	8	4	10	1	0	1	1	1	0.5	1	21	70	10	3.7	7	5	18	10	5	3	8
15	Y198	9	F	34.69	ID	E3/E4	1	1	1	1	1	0	1	16	63	10	0.5	6	10	5	10	10	4	7	1	1	1	1	1	0	1	13	60	10	0	7	6	7	9	7	7	6.5
16	Y199	0	F	37.5369	II	E3/E3	2	2	2	1	2	1	2	6	24	3	0	4	0	3	4	6	1	2.7	2	2	2	1	2	1	2	4	16	3	0	1	0	0	6	1	1	3.9
17	Y156	0	F	270.458	DD	E3/E4	2	2	1	1	2	1	1	8	18	2	0.5	6	0	3	0	2	0	3.9	2	1	1	2	2	1	1	8	27	5	0	6	0	3	4	4	2	2.6
18	Y248	6	M	153.92	II	E3/E3	0.5	0.5	0.5	0.5	0.5	0	0.5	24	90	10	10	8	8	18	10	9	9	8.5	0.5	0.5	0	0.5	0	0	0.5	22	84	10	8.4	6	10	14	8	10	10	7.5
19	Y256	6	M	81.88	ID	E3/E4	1	0.5	0.5	0	0	0	0.5	20	74	10	2.2	7	6	16	9	5	6	9	1	0.5	0.5	0	0	0	5	22	78	10	5.2	6	6	18	9	7	7	10
20	Y257	4	F	97.41	ID	E3/E4	1	0.5	1	1	1	0	1	18	65	9	0	6	8	14	10	8	3	6.5	1	0.5	1	1	1	0	1	20	67	10	1	7	8	13	8	7	5	7.5
21	Y205	6	F	254.68	II	E3/E4	2	2	2	2	2	1	2	9	32	8	0	3	4	6	5	1	2	2.4	2	2	2	2	2	1	2	6	27	5	0	0	0	6	4	0	5	2.7
22	Y263	12	M	32.42	II	E3/E4	1	0.5	0	0.5	0	0	0.5	25	86	10	3	8	10	14	10	6	9	10	2	1	1	1	2	1	1	11	39	8	0	5	1	7	6	2	3	4.8
23	Y268	0	F	42.85	II	E3/E4	0	0	0	0	0	0	0	23	83	10	8.5	6	8	18	10	7	7	8.5	0.5	0	0	0	0	0	0.5	21	81	10	5.3	7	8	16	10	8	8	8.5
24	Y273	6	M	87.76	II	E3/E3	2	1	1	0.5	0.5	1	1	13	46	5	2.4	5	5	7	7	5	3	5	3	3	2	2	2	1	2	2	8	4	0	0	0	2	0	0	0	2.1
25	Y191	6	F	238.87	II	E3/E3	1	1	0.5	1	1	0	1	23	68	8	1	7	10	11	8	9	4	10	1	1	0.5	1	1	1	1	16	62	10	1	7	5	8	6	10	5	9.5
26	Y143	1	F	73.65	II	E3/E4	1	1	0.5	1	0	0	0.5	15	55	9	2.8	6	3	10	6	6	5	7.5	1	1	0.5	1	0	0	0.5	16	60	10	2.4	6	2	14	6	7	5	7.5
27	Y293	0	M	46.75	II	E3/E3	1	1	0.5	0.5	0.5	1	0.5	17	59	10	1.8	5	5	14	4	2	5	8.5	1	1	1	0.5	0.5	1	1	15	58	8	1.2	5	4	10	7	7	7	8.5
28	Y300	12	M	67.09	ID	E3/E4	1	0.5	0	0.5	0.5	0	0.5	25	81	10	2.8	7	9	11	1	10	7	6.1	1	1	0.5	1	0.5	0	0.5	23	72	9	2.1	8	9	11	10	2	6	9.7
29	Y304	0	F	103.2	ID	E3/E3	1	1	1	1	0.5	0	1	12	51	10	0	3	6	7	10	3	2	5.5	1	1	1	1	1	0	1	11	46	10	0.5	2	1	10	7	2	4	5.5
30	Y305	12	F	88.8	II	E4/E4								22	72										1	0.5	1	0.5	1	0	0.5	72	20	10	1.7	8	6	15	10	2	4	9
31	Y241	12	M	119	II	E3/E3	1	1	0.5	0.5	1	0	0.5	21	62	10	0	8	7	6	10	6	5	10	1	1	0.5	1	1	0	1	21	70	8	0.5	6	8	12	9	11	5	10
32	Y312	2	F	27.1983	II	E3/E3	0.5	0.5	0.5	0.5	0.5	0	0.5	18	73	10	9.4	6	3	15	10	1	5	5	1	0.5	1	0.5	0.5	1	0.5	17	58	10	2.8	6	0	15	8	5	4	7.5
33	Y321	16	M	73.514	ID	E4/E4	1	1	0.5	0.5	0.5	1	0.5	20	69	10	1.6	3	8	10	10	11	5	10
34	Y340	3	F	50.4991	II	E2/E3	1	0.5	1	1	1	0	1	21	75	10	8.9	10	6	18	10	6	6	7.1	2	1	1	1	2	1	1	6	29	0	3.8	2	0	4	1	5	1	0.6
35	Y344	9	F	88.4606	ID	E3/E4	1	1	1	1	1	0	1	18	55	10	0	6	1	12	7	1	5	9.7	1	1	1	1	1	0	1	17	63	10	0.5	7	5	9	10	3	4	9
